# Supplementary material for: Neuroplasticity Underlying Prolonged Intermittent Theta-Burst Stimulation in the Regulation of Disorders of Consciousness: Pilot Randomized Controlled Trial
Source: Research Square preprint supplement (doi:10.21203/rs.3.rs-7444783/v1), 2025-10-21
Supplement: Supplementary file 1 [file fae41f0af461a4188ddee26d.docx]

**Neuroplasticity Underlying Prolonged Intermittent Theta-Burst Stimulation in the Regulation of Disorders of Consciousness: Pilot Randomized Controlled Trial**

Hui Li1, 2, Linghui Dong2, 4, Zhiqing Tang2, 3, Tianhao Liu1, 2, Jiajie Liu2, 3, Lei Cao1, Xiaonian Zhang2, 3 and Hao Zhang2, 3, 4*

1 Department of Rehabilitation, Xuanwu Hospital Capital Medical University, Beijing, China

2 China Rehabilitation Research Center, Beijing, China

3 Capital Medical University, Beijing, China

4 Cheeloo College of Medicine, Shandong University, Jinan, Shandong, China

**Supplementary Materials**

**Study protocol2**

**CONSORT 2010 checklist** **14**

**Supplementary Tables** **17**

**Protocol and statistical analysis plan of a pilot randomized clinical trial of prolonged iTBS in patients with prolonged disorders of consciousness**

**PiTBS for Prolonged Disorders of Consciousness**

**SUMMARY**

**INTRODUCTION:** Prolonged disorders of consciousness (DOC) manifest as a general decline in cortical excitability. Intermittent theta burst stimulation (iTBS) represents a novel form of transcranial magnetic stimulation that elicits sustained cortical excitation through short-duration, low-intensity stimulation, and higher doses of prolonged iTBS (piTBS) may cause more significant efficacy.

**Aim:** To explore the impact of high-dose iTBS on the improvement of consciousness levels of prolonged DOC.

**Methods:** This is a single center, two-arm, randomized controlled clinical trial. A total of 20 patients aged between 18 and 75 years, diagnosed with prolonged DOC, will be included. Patients will receive conventional treatment and will be randomly assigned to either the piTBS or sham groups. The primary outcome will be the change in Coma Recovery Scale-Revised (CRS-R) scores.

**CONCLUSION:** This is the first well-powered study to compare the effects of piTBS with sham stimulation on the level of consciousness in patients with prolonged DOC.

**FUNDING:** Funded by the key project of China Rehabilitation Research Center (Grant number 2023ZX-02).

**REGISTRATION:** Clinical trial registration number: ChiCTR2300069618. Registered on March 22, 2023.

**KEYWORDS:** Prolonged disorders of consciousness; Intermittent theta burst stimulation; High dose; Neurorehabilitation.

**Introduction**

**Disorders of Consciousness (DOC): Definition and Clinical Challenge**

Disorders of consciousness (DOC) are typified by a state of diminished or absent consciousness ensuing from severe cerebral trauma, frequently accompanied by widespread attenuation of excitatory synaptic activity within the cortical regions consequent to brain damage induced by trauma, hemorrhage, ischemic-hypoxic brain injury, among others (Thibaut et al., 2019). Patients exhibiting DOC beyond a 28-day threshold are classified under prolonged DOC, encompassing both vegetative state (VS)/unresponsive wakefulness syndrome (UWS) and minimally conscious state (MCS) (Kondziella et al., 2020). The rehabilitation period for prolonged DOC is fraught with challenges owing to the absence of targeted and effective therapeutic interventions. Consequently, there is an imperative need to explore more efficacious arousal therapies to address the pressing needs of both patients’ families and healthcare practitioners.

**Repetitive Transcranial Magnetic Stimulation (rTMS) and Theta Burst Stimulation (TBS): Mechanisms and Clinical Applications**

Repetitive transcranial magnetic stimulation (rTMS) represents a non-invasive neuroregulatory technique that employs magnetic pulses to induce localized neural depolarization and discharge, thereby exerting modulatory effects on neural plasticity and cortical excitability in prolonged DOC (Lefaucheur et al., 2020, O'Neal et al., 2021). Theta burst stimulation (TBS), an advanced form of rTMS, delivers clustered bursts of neural electrical activity, fostering sustained enhancement in brain plasticity and more accurately mimicking the natural physiological rhythms of the human brain (Hermiller et al., 2020). The structural framework of TBS encompasses a burst frequency of 5 Hz, each burst encapsulating three 50 Hz pulses. Based on its distinctive stimulation patterns, TBS can be further subdivided into continuous mode and intermittent mode, the latter serving as an excitatory mode that induces long-term enhancements in brain function (Rounis and Huang, 2020).

**Intermittent Theta Burst Stimulation (iTBS): Efficacy and Safety in Neurological and Psychiatric Disorders**

Intermittent theta burst stimulation (iTBS) has exhibited regulatory influences in neurological and psychotic disorders (Elmaghraby et al., 2022). Furthermore, studies have confirmed the safety, tolerability, and feasibility of iTBS, with no significant disparities observed when compared to high-frequency rTMS (Kishi et al., 2023). iTBS can engender more durable cortical excitatory effects through succinct, low-intensity stimulation, simultaneously mitigating coil overheating concerns associated with conventional rTMS (Di Lazzaro et al., 2011). Huang et al., reported that a single session of 600-pulse iTBS significantly altered the functional connectivity of brain activity in patients with VS (Huang et al., 2024). Likewise, Wu et al., found that administering 600 pulses of iTBS daily over five consecutive days markedly enhanced consciousness levels (Wu et al., 2018). These findings suggest that a conservative iTBS dose can facilitate improvements in consciousness.

**Dose-Response Relationship in iTBS: Implications for Treatment Efficacy**

Previous investigations have suggested that higher doses of TBS may yield more pronounced and sustained improvements compared to lower doses. As an intensified iTBS paradigm, prolonged iTBS (piTBS) enhances neuroplasticity modulation by doubling pulse quantity per session, thereby prolonging stimulation time (e.g., 1800 pulses, 10 min). Nettekoven et al. hypothesized that the administration of piTBS (1800 pulses) significantly amplifies cortical excitability and brain functional connectivity relative to low-dose (600 pulses) regimens (Nettekoven et al., 2014). In our prior study, it was established that 1800 pulsed doses could safely and effectively modulate neuroplasticity and promote motor function recovery in stroke patients (Tang et al., 2024). Complemented by prior evidence that high-dose iTBS can effectively alleviate neurological conditions such as treatment-resistant depression (Cole et al., 2020), we posit that more refractory conditions may necessitate higher pulse doses to elicit a therapeutic response. Nonetheless, extant literature on the effects of high-dose iTBS on prolonged DOC remains sparse (Wu et al., 2018, Huang et al., 2024).

**Protocol for a Prospective Randomized Controlled Trial: High-Dose iTBS versus Sham Stimulation in Prolonged DOC**

The present study delineates the protocol and statistical analysis plan for a prospective randomized controlled trial comparing the efficacy of piTBS against sham stimulation in enhancing consciousness recovery in patients with prolonged DOC. This trial is registered with ChiCTR (ChiCTR2300069618).

**METHODS**

*Study design*

This is an investigator-initiated, single-center, randomized trial comparing piTBS with sham stimulation, conducted at Beijing Boai Hospital, an affiliate of the China Rehabilitation Research Center. The protocol has been approved by the Ethics Committee of the China Rehabilitation Research Center, and informed consent will be obtained from the legal representatives of all patients prior to their inclusion in the trial. No interim analyses are planned for this study.

*Study population*

Inclusion criteria

Patients qualifying for inclusion in the study must meet all of the following criteria:

1. Age between 18 and 75 years.
2. Diagnosed with UWS/VS or MCS based on five CRS-R assessments.
3. Disease duration exceeding 28 days.
4. Stable clinical condition.
5. First onset.
6. Legal representatives have been fully informed about the treatment and examination procedures and have provided signed informed consent.

Exclusion criteria

Patients will be excluded from the study if any of the following criteria listed are applicable:

1. Presence of complications such as heart failure, kidney failure, acute lung injury, or acute stage lung infection.
2. History of mental illness, alcohol, or drug abuse;
3. Presence of metallic implants in the brain;
4. Skull repair or defect at the target site of treatment;
5. Prior TMS treatment within the last three months;
6. History of seizures within the past month;
7. Other contraindications to rTMS treatment.

*Randomization and masking*

A randomization list will be computer-generated to ensure impartial allocation. Randomization will be executed utilizing opaque, sealed envelopes held by an independent researcher, thereby eliminating any stratification factor. Patients meeting all inclusion criteria and devoid of exclusion criteria will be randomly assigned on a 1:1 ratio to receive either piTBS or sham stimulation. To uphold the study’s integrity, patients, their families, caregivers, medical staff, clinical assessors, data collectors, statistical analysts, and other researchers will remain blinded to the group assignments.

*Intervention*

Patients enrolled in the study will concurrently undergo 2 hours of standard rehabilitation therapy daily, encompassing physical therapy, occupational therapy, tilt-table training, cycle ergometer training, therapeutic massage, and acupuncture treatment administered by licensed therapists who are unaware of the treatment allocation. Medication therapy will be prescribed by the physician based on the patient’s specific medical condition and will not be altered due to study enrollment. Patients will be randomly assigned to receive one of the following interventions:

PiTBS stimulation

Patients assigned to the piTBS group will undergo targeted piTBS applied to the left dorsolateral prefrontal cortex (DLPFC). The stimulation will be administered at 80% of the resting motor threshold (RMT), consisting of 10 bursts of triplet 50 Hz bursts repeated at 5 Hz. This sequence alternates between 2-second bursts and 8-second pauses, totaling 60 cycles and 1800 pulses per session, with a total duration of 9 minutes and 42 seconds. The treatment will be conducted once daily over 10 consecutive days, resulting in a cumulative total of 18,000 pulses.

Sham stimulation

Patients in the sham group will undergo sham stimulation using a sham coil identical in appearance to the active coil. Although the parameters and target mimic those of the piTBS group, no actual stimulation will be delivered to the scalp.

*Data collection*

A specially-constructed Case Report Form (CRF) will be utilized for data collection. All data will be directly extracted from clinical medical records by trained researchers at the research center. The information DOCumented in the CRF must accurately correspond to the participants’ medical and hospital records. The timeline, procedures, and assessments are detailed in Table 1. Upon completion of data collection, the database will be secured, with access restricted exclusively to the principal investigator and the statistician.

*Study outcomes*

Primary outcome

The primary outcome will be the alteration in CRS-R scores. CRS-R assessments will be performed within three days prior to treatment, on the day following five treatment sessions, ten treatment sessions, and one month (± 2 days) after the completion of treatment. Detailed information regarding the CRS is provided in Table 2. The CRS-R scale comprises six subscales with an aggregate score of 23 points, evaluating auditory (0-4), visual (0-5), motor (0-6), verbal (0-3), communication (0-2), and arousal (0-3). A higher CRS-R score indicates an improved level of consciousness in the patient (Giacino et al., 2004). The assessment of CRS-R will be carried out by two blinded physicians unaware of the treatment assignments.

Secondary outcomes

Secondary outcomes will include:

- Response rate post ten sessions, defined as an increase in the CRS-R score in any domain following piTBS relative to baseline (O'Neal et al., 2021);
- Intra- and inter-group differences current source density and functional connectivity analyzed using standardized low-resolution brain electromagnetic tomography (analyzed from 20 minutes of 64-channel resting EEG data recorded using CURRY 8 Software, with the reference electrode positioned between CZ and CPZ, and the ground electrode placed between FPZ and FZ. All electrode impedances will be maintained below 5 kΩ, and the sampling rate will be set to 1000 Hz).
- Changes in brain-derived neurotrophic factor and neurotransmitters levels (dopamine, glutamate, serotonin, and γ-aminobutyric acid) pre- and post-intervention.

*Sample size calculation*

The sample size for this study was calculated based on previous observations indicating an increase in CRS-R score increased from 6.0 ± 1.0 to 9.9 ± 2.2 following iTBS intervention (Wu et al., 2018). A sample size of 20 patients will provide 80% power at a two-tailed alpha level of 0.05, accounting for a dropout rate of 20%.

*Statistical analyses*

Unless specified otherwise, statistical analyses will be conducted using data from the intention-to-treat population, according to assigned treatment groups. Expected losses to follow-up are negligible for both primary and secondary outcomes. Comprehensive analyses will be performed for all outcomes. Missing values will be imputed using mean or median imputation.

Baseline characteristics

Descriptive baseline characteristics of participants will be presented by group (Table 3). Continuous variables will be summarized as means with standard error of the mean (SEM) or medians with interquartile ranges, depending on the distribution of the variable. Categorical variables will be summarized numerically, with percentages calculated based on the number of participants for whom data are available.

Primary Outcome Analysis

Changes in CRS-R scores between the iTBS group and sham group at various time points will be reported as mean (SEM) and described by mean difference (MD), 95% confidence intervals, and significant p-values, or reported as median (quartiles) and described by Z score and p-values (Table 4).

Secondary Outcomes Analysis

The effects of the intervention on secondary outcomes will be reported as mean (SEM) described using MD and 95% confidence intervals, median (quartiles) and described by Z score and p-values or percentages (Table 4).

*Informed Consent and Ethical Compliance*

All patients will be required to provide informed consent before participating in the study. Two circumstances may lead to the discontinuation of trial treatment:

• The patient's legal representative may refuse consent for continued participation; or

• The patient's legal representative may withdraw consent for ongoing participation in the trial.

In either case, piTBS or sham stimulation will be halted, and the patient will continue with conventional rehabilitation therapy. Consent for data collection will then be sought; if consent is not granted, the patient’s data will be deleted and no analyses will be performed, except for those related to randomization and consent.

*Data safety monitoring board*

No independent monitoring committee will oversee this study.

**CONCLUSION**

This study is a single-center randomized clinical trial conducted at the China Rehabilitation Research Center, aiming to recruit a total of 20 patients to compare the efficacy and mechanisms of piTBS versus sham stimulation in individuals with prolonged DOC. The anticipated intervention duration is 10 days, involving 1800 pulses per day and a total dose of 18,000 pulses.

**Table S1. SPIRIT diagram, study timelines and procedures**

| **Enrollment** | Pre randomization | Randomization | Post randomization | | | |
| --- | --- | --- | --- | --- | --- | --- |
| Pre intervention | 5 sessions | 10 sessions | 1-month post intervention |
| Eligibility screening | 🗴 |  |  |  |  |  |
| Allocation |  | 🗴 |  |  |  |  |
| Baseline data | 🗴 |  |  |  |  |  |
| Informed consent | 🗴 |  |  |  |  |  |
| **Interventions** |  |  |  |  |  |  |
| PiTBS |  |  |  | 🗴 | 🗴 |  |
| sham |  |  |  | 🗴 | 🗴 |  |
| **Measurements** |  |  |  |  |  |  |
| CRS-R |  |  | 🗴 | 🗴 | 🗴 | 🗴 |
| EEG |  |  | 🗴 |  | 🗴 |  |
| **Outcomes (changes)** |  |  |  |  |  |  |
| CRS-R score |  |  | 🗴 | 🗴 | 🗴 | 🗴 |
| Response rate |  |  |  |  | 🗴 |  |
| Current source density |  |  |  |  | 🗴 |  |
| Functional connectivity |  |  |  |  | 🗴 |  |
| Brain-derived neurotrophic factor |  |  |  |  | 🗴 |  |
| Neurotransmitter |  |  |  |  | 🗴 |  |
| **Adverse events** |  |  |  | 🗴a | 🗴a | 🗴a |

PiTBS, prolonged intermittent theta burst stimulation; CRS-R, coma recovery scale-revised; EEG, electroencephalogram. a: when necessary.

**Table A2.** **COMA RECOVERY SCALE-REVISED Form**

| JFK COMA RECOVERY SCALE |
| --- |
| AUDITORY FUNCTION SCALE |
| 4 - Consistent Movement to Command |
| 3 - Reproducible Movement to Command |
| 2 - Localization to Sound |
| 1 - Auditory Startle |
| 0 - None |
| VISUAL FUNCTION SCALE |
| 5 - Object Recognition |
| 4 - Object Localization: Reaching |
| 3 - Visual Pursuit |
| 2 - Fixation |
| 1- Visual Startle |
| 0 - None |
| MOTOR FUNCTION SCALE |
| 6 - Functional Object Use |
| 5 - Automatic Motor Response |
| 4 - Object Manipulation |
| 3 - Localisation to Noxious Stimulation |
| 2 - Flexion Withdrawal |
| 1 - Abnormal Posturing |
| 0 - None |
| OROMOTOR/VERBAL FUNCTION SCALE |
| 3 - Intelligible Verbalization |
| 2 - Vocalization/Oral Movement |
| 1 - Oral Reflexive Movement |
| 0 - None |
| COMMUNICATION SCALE |
| 2 - Functional: Accurate |
| 1 - Non-functional: Intentional |
| 0 - None |
| AROUSAL SCALE |
| 3 - Attention |
| 2 - Eye Opening w/o Stimulation |
| 1 - Eye Opening with Stimulation |
| 0 - Unarousable |

This study employed the Chinese version of the CRS-R scale, the reliability and validity of which have been confirmed previously(Zhang et al., 2019).

**Table S3.** Demographic and variables at baseline.

| **Variables** | **piTBS** (**n= )** | **sham** (**n= )** | ***p*-value** |
| --- | --- | --- | --- |
| Categorical variables (N) |  |  |  |
| Gender |  |  |  |
| female |  |  |  |
| male |  |  |
| Etiology |  |  |  |
| TBI |  |  |  |
| CVD |  |  |
| Education |  |  |  |
| Primary school or less |  |  |  |
| Secondary or school |  |  |
| Bachelor's degree or higher |  |  |
| Continuous variables: mean (SEM)/median (quartiles) |  |  |  |
| Age (years) |  |  |  |
| Illness duration (days) |  |  |  |
| CRS-R |  |  |  |
| Auditory |  |  |  |
| Visual |  |  |  |
| Motor |  |  |  |
| Oromotor/verbal |  |  |  |
| Communication |  |  |  |
| Arousal |  |  |  |
| Received conventional rehabilitation |  |  |  |

piTBS, prolonged intermittent theta burst stimulation; TBI, traumatic brain injury; CVD, cerebrovascular disease; CRS-R, coma recovery scale-revised.

**Table S4.** Primary and secondary outcomes.

|  | **piTBS** | **sham** | **MD (95%CI)/ Z score** | ***p*-value** |
| --- | --- | --- | --- | --- |
| **Primary outcomes** |  |  |  |  |
| CRS-R score changes |  |  |  |  |
| 5 sessions |  |  |  |  |
| 10 sessions |  |  |  |  |
| 1-month post intervention |  |  |  |  |
| **Secondary outcomes** |  |  |  |  |
| Response rate |  |  |  |  |
| Post 10 sessions by CRS-R |  |  |  |  |
| EEG |  |  |  |  |
| Microstate |  |  |  |  |
| Transition probabilities |  |  |  |  |
| Mean duration |  |  |  |  |
| Time coverage |  |  |  |  |
| Occurrence |  |  |  |  |
| sLORETA |  |  |  |  |
| Current source density |  |  |  |  |
| Functional connectivity |  |  |  |  |
| Brain-derived neurotrophic factor |  |  |  |  |
| Neurotransmitter |  |  |  |  |
| Dopamine |  |  |  |  |
| Glutamate |  |  |  |  |
| Serotonin |  |  |  |  |
| γ-aminobutyric acid |  |  |  |  |

piTBS, prolonged intermittent theta burst stimulation; CRS-R, coma recovery scale-revised. MD, mean difference.

**CONFLICT OF INTEREST**

The authors declare no conflict of interest.

**References**

COLE, E. J., STIMPSON, K. H., BENTZLEY, B. S., GULSER, M., CHERIAN, K., TISCHLER, C., NEJAD, R., PANKOW, H., CHOI, E., AARON, H., ESPIL, F. M., PANNU, J., XIAO, X., DUVIO, D., SOLVASON, H. B., HAWKINS, J., GUERRA, A., JO, B., RAJ, K. S., PHILLIPS, A. L., BARMAK, F., BISHOP, J. H., COETZEE, J. P., DEBATTISTA, C., KELLER, J., SCHATZBERG, A. F., SUDHEIMER, K. D. & WILLIAMS, N. R. 2020. Stanford Accelerated Intelligent Neuromodulation Therapy for Treatment-Resistant Depression. *Am J Psychiatry,* 177**,** 716-726.

DI LAZZARO, V., DILEONE, M., PILATO, F., CAPONE, F., MUSUMECI, G., RANIERI, F., RICCI, V., BRIA, P., DI IORIO, R., DE WAURE, C., PASQUALETTI, P. & PROFICE, P. 2011. Modulation of motor cortex neuronal networks by rTMS: comparison of local and remote effects of six different protocols of stimulation. *J Neurophysiol,* 105**,** 2150-6.

ELMAGHRABY, R., SUN, Q., OZGER, C., SHEKUNOV, J., ROMANOWICZ, M. & CROARKIN, P. E. 2022. A Systematic Review of the Safety and Tolerability of Theta Burst Stimulation in Children and Adolescents. *Neuromodulation,* 25**,** 494-503.

GIACINO, J. T., KALMAR, K. & WHYTE, J. 2004. The JFK Coma Recovery Scale-Revised: measurement characteristics and diagnostic utility. *Arch Phys Med Rehabil,* 85**,** 2020-9.

HERMILLER, M. S., CHEN, Y. F., PARRISH, T. B. & VOSS, J. L. 2020. Evidence for Immediate Enhancement of Hippocampal Memory Encoding by Network-Targeted Theta-Burst Stimulation during Concurrent fMRI. *The Journal of Neuroscience,* 40**,** 7155-7168.

HUANG, Y., XIA, X., MENG, X., BAI, Y. & FENG, Z. 2024. Single session of intermittent theta burst stimulation alters brain activity of patients in vegetative state. *Aging (Albany NY),* 16**,** 7119-7130.

KISHI, T., SAKUMA, K., MATSUDA, Y., KITO, S. & IWATA, N. 2023. Intermittent theta burst stimulation vs. high-frequency repetitive transcranial magnetic stimulation for major depressive disorder: A systematic review and meta-analysis. *Psychiatry Res,* 328**,** 115452.

KONDZIELLA, D., BENDER, A., DISERENS, K., VAN ERP, W., ESTRANEO, A., FORMISANO, R., LAUREYS, S., NACCACHE, L., OZTURK, S., ROHAUT, B., SITT, J. D., STENDER, J., TIAINEN, M., ROSSETTI, A. O., GOSSERIES, O., CHATELLE, C. & EAN PANEL ON COMA, D. O. C. 2020. European Academy of Neurology guideline on the diagnosis of coma and other disorders of consciousness. *Eur J Neurol,* 27**,** 741-756.

LEFAUCHEUR, J. P., ALEMAN, A., BAEKEN, C., BENNINGER, D. H., BRUNELIN, J., DI LAZZARO, V., FILIPOVIC, S. R., GREFKES, C., HASAN, A., HUMMEL, F. C., JAASKELAINEN, S. K., LANGGUTH, B., LEOCANI, L., LONDERO, A., NARDONE, R., NGUYEN, J. P., NYFFELER, T., OLIVEIRA-MAIA, A. J., OLIVIERO, A., PADBERG, F., PALM, U., PAULUS, W., POULET, E., QUARTARONE, A., RACHID, F., REKTOROVA, I., ROSSI, S., SAHLSTEN, H., SCHECKLMANN, M., SZEKELY, D. & ZIEMANN, U. 2020. Evidence-based guidelines on the therapeutic use of repetitive transcranial magnetic stimulation (rTMS): An update (2014-2018). *Clin Neurophysiol,* 131**,** 474-528.

NETTEKOVEN, C., VOLZ, L. J., KUTSCHA, M., POOL, E. M., REHME, A. K., EICKHOFF, S. B., FINK, G. R. & GREFKES, C. 2014. Dose-dependent effects of theta burst rTMS on cortical excitability and resting-state connectivity of the human motor system. *J Neurosci,* 34**,** 6849-59.

O'NEAL, C. M., SCHROEDER, L. N., WELLS, A. A., CHEN, S., STEPHENS, T. M., GLENN, C. A. & CONNER, A. K. 2021. Patient Outcomes in Disorders of Consciousness Following Transcranial Magnetic Stimulation: A Systematic Review and Meta-Analysis of Individual Patient Data. *Front Neurol,* 12**,** 694970.

ROUNIS, E. & HUANG, Y. Z. 2020. Theta burst stimulation in humans: a need for better understanding effects of brain stimulation in health and disease. *Experimental Brain Research,* 238.

TANG, Z., HUANG, J., ZHOU, Y., REN, J., DUAN, X., FU, X., PAN, R., WANG, R., ZHANG, P., DING, M., SUN, J., ZHANG, X., CHI, Q., ZHANG, Y., ZHANG, X., YU, W., XU, L., ZHANG, H. & LIU, H. 2024. Efficacy and Safety of High-Dose TBS on Post-Stroke Upper Extremity Motor Impairment: A Randomized Controlled Trial. *Stroke*.

THIBAUT, A., SCHIFF, N., GIACINO, J., LAUREYS, S. & GOSSERIES, O. 2019. Therapeutic interventions in patients with prolonged disorders of consciousness. *Lancet Neurol,* 18**,** 600-614.

WU, M., WU, Y., YU, Y., GAO, J., MENG, F., HE, F., SHI, J. & LUO, B. 2018. Effects of theta burst stimulation of the left dorsolateral prefrontal cortex in disorders of consciousness. *Brain Stimul,* 11**,** 1382-1384.

ZHANG, Y., WANG, J., SCHNAKERS, C., HE, M., LUO, H., CHENG, L., WANG, F., NIE, Y., HUANG, W., HU, X., LAUREYS, S. & DI, H. 2019. Validation of the Chinese version of the Coma Recovery Scale-Revised (CRS-R). *Brain Inj,* 33**,** 529-533.

**CONSORT 2010 checklist**

**
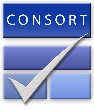
****CONSORT 2010 checklist of information to include when reporting a randomised trial***

| **Section/Topic** | **Item No** | **Checklist item** | **Reported on page No** |
| --- | --- | --- | --- |
| **Title and abstract** | | | |
|  | 1a | Identification as a randomised trial in the title | 1 |
| 1b | Structured summary of trial design, methods, results, and conclusions (for specific guidance see CONSORT for abstracts) | 3 |
| **Introduction** | | | |
| Background and objectives | 2a | Scientific background and explanation of rationale | 4, 5 |
| 2b | Specific objectives or hypotheses | 5 |
| **Methods** | | | |
| Trial design | 3a | Description of trial design (such as parallel, factorial) including allocation ratio | 6 |
| 3b | Important changes to methods after trial commencement (such as eligibility criteria), with reasons | NA |
| Participants | 4a | Eligibility criteria for participants | 6 |
| 4b | Settings and locations where the data were collected | 6 |
| Interventions | 5 | The interventions for each group with sufficient details to allow replication, including how and when they were actually administered | 7 |
| Outcomes | 6a | Completely defined pre-specified primary and secondary outcome measures, including how and when they were assessed | 7, 8 |
| 6b | Any changes to trial outcomes after the trial commenced, with reasons | NA |
| Sample size | 7a | How sample size was determined | 9 |
| 7b | When applicable, explanation of any interim analyses and stopping guidelines | NA |
| Randomisation: |  |  |  |
| Sequence generation | 8a | Method used to generate the random allocation sequence | 6 |
| 8b | Type of randomisation; details of any restriction (such as blocking and block size) | 6 |
| Allocation concealment mechanism | 9 | Mechanism used to implement the random allocation sequence (such as sequentially numbered containers), describing any steps taken to conceal the sequence until interventions were assigned | 6 |
| Implementation | 10 | Who generated the random allocation sequence, who enrolled participants, and who assigned participants to interventions | 6 |
| Blinding | 11a | If done, who was blinded after assignment to interventions (for example, participants, care providers, those assessing outcomes) and how | 7 |
| 11b | If relevant, description of the similarity of interventions | 7 |
| Statistical methods | 12a | Statistical methods used to compare groups for primary and secondary outcomes | 9, 10 |
| 12b | Methods for additional analyses, such as subgroup analyses and adjusted analyses | 10 |
| **Results** | | | |
| Participant flow (a diagram is strongly recommended) | 13a | For each group, the numbers of participants who were randomly assigned, received intended treatment, and were analysed for the primary outcome | 10 |
| 13b | For each group, losses and exclusions after randomisation, together with reasons | 10 |
| Recruitment | 14a | Dates defining the periods of recruitment and follow-up | 10 |
| 14b | Why the trial ended or was stopped | NA |
| Baseline data | 15 | A table showing baseline demographic and clinical characteristics for each group | 12 |
| Numbers analysed | 16 | For each group, number of participants (denominator) included in each analysis and whether the analysis was by original assigned groups | 11 |
| Outcomes and estimation | 17a | For each primary and secondary outcome, results for each group, and the estimated effect size and its precision (such as 95% confidence interval) | 13, 14, 15 |
| 17b | For binary outcomes, presentation of both absolute and relative effect sizes is recommended | NA |
| Ancillary analyses | 18 | Results of any other analyses performed, including subgroup analyses and adjusted analyses, distinguishing pre-specified from exploratory | 13 |
| Harms | 19 | All important harms or unintended effects in each group (for specific guidance see CONSORT for harms) | NA |
| **Discussion** | | | |
| Limitations | 20 | Trial limitations, addressing sources of potential bias, imprecision, and, if relevant, multiplicity of analyses | 19 |
| Generalisability | 21 | Generalisability (external validity, applicability) of the trial findings | 19 |
| Interpretation | 22 | Interpretation consistent with results, balancing benefits and harms, and considering other relevant evidence | 16, 17, 18 |
| **Other information** | | |  |
| Registration | 23 | Registration number and name of trial registry | 6 |
| Protocol | 24 | Where the full trial protocol can be accessed, if available | Supplement |
| Funding | 25 | Sources of funding and other support (such as supply of drugs), role of funders | 20 |

Citation: Schulz KF, Altman DG, Moher D, for the CONSORT Group. CONSORT 2010 Statement: updated guidelines for reporting parallel group randomised trials. BMC Medicine. 2010;8:18.
© 2010 Schulz et al. This is an Open Access article distributed under the terms of the Creative Commons Attribution License (<http://creativecommons.org/licenses/by/2.0>), which permits unrestricted use, distribution, and reproduction in any medium, provided the original work is properly cited.

*We strongly recommend reading this statement in conjunction with the CONSORT 2010 Explanation and Elaboration for important clarifications on all the items. If relevant, we also recommend reading CONSORT extensions for cluster randomised trials, non-inferiority and equivalence trials, non-pharmacological treatments, herbal interventions, and pragmatic trials. Additional extensions are forthcoming: for those and for up-to-date references relevant to this checklist, see [www.consort-statement.org](http://www.consort-statement.org).

**Supplementary tables.**

**Table S5. Between-group comparisons of CRS-R score changes at each time point between the prolonged intermittent theta-burst stimulation (piTBS) group and the sham stimulation group**

| **Time** | **piTBS**  **Median (quartiles)** | **sham**  **Median (quartiles)** | **Z score** | ***p value*** |
| --- | --- | --- | --- | --- |
| T1 | 0 (0, 1.00) | 0 | 1.826 | 0.068 |
| T2 | 1.00 (0, 1.25) | 0 | 2.332 | 0.020* |
| T3a | 1.00 (0, 2.00) | 0 | 2.441 | 0.015* |
| T3b | 1.00 (0, 2.00) | 0 | 2.005 | 0.045* |

a: Interpolation, n=10 for each group; b: No interpolation or correction, n=9 for piTBS group and n=8 for sham group. T1, after 5 treatments. T2, after 10 treatments. T3, one-month after the end of treatment. CRS-R, coma recovery scale-revised. * *p*<0.05.

**Table S6.** **Within-group comparisons of CRS-R score changes across different time points for both the prolonged intermittent theta-burst stimulation (piTBS) group and the sham stimulation group**

|  |  | **Interpolation** | | **No interpolation** | |
| --- | --- | --- | --- | --- | --- |
| **Statistic** | ***p* value** | **Statistic** | ***p* value** |
| Friedman | piTBS | 17.316 | <0.001*** | 15.706 | 0.001** |
| sham | 3.000 | 0.392 | 3.000 | 0.392 |
| Pairwise comparison（piTBS） | T1 vs T0 | 0.693 | 0.488 | 0.730 | 0.465 |
| T2 vs T0 | 1.992 | 0.046* | 2.100 | 0.036* |
| T2 vs T1 | 1.299 | 0.194 | 1.369 | 0.171 |
| T3 vs T0 | 2.858 | 0.004** | 2.647 | 0.008** |
| T3 vs T1 | 2.165 | 0.030* | 1.917 | 0.055 |
| T3 vs T2 | 0.866 | 0.386 | 0.548 | 0.584 |

CRS-R, coma recovery scale-revised. * *p*<0.05, ** *p*<0.01, *** *p*<0.001.

**Table S7.** **Comparison of microstate (MS) parameters between prolonged intermittent theta-burst stimulation (piTBS) and sham groups pre- and post-intervention.**

| **Variables** | **piTBS (n=10)**  **Mean (SEM)** | **sham(n=10)**  **Mean (SEM)** | **piTBS vs sham**  **MD (95%CI)** |
| --- | --- | --- | --- |
| Mean duration |  |  |  |
| MS1 | -0.05 (2.29) | -3.29 (4.27) | 3.24 (-7.14, 13.62) |
| MS2 | 3.60 (1.89) | -4.34 (1.62) | 7.94 (2.60, 13.29) ** |
| MS3 | 0.33 (0.71) | -5.54 (3.75) | 5.87 (-2.31, 14.05) |
| MS4 | 0.60 (2.57) | -0.79 (1.56) | 1.39 (-5.05, 7.84) |
| Time cover |  |  |  |
| MS1 | -2.48 (3.20) | -3.56 (8.20) | 1.08 (-17.79, 19.95) |
| MS2 | 9.52 (3.81) | -1.78 (2.87) | 11.31 (1.08, 21.54) * |
| MS3 | -0.40 (1.24) | -8.05 (8.07) | 7.65 (-9.87, 25.17) |
| MS4 | 3.91 (6.09) | 2.83 (2.75) | 1.08 (-13.26, 15.42) |
| Occurrence |  |  |  |
| MS1 | -0.23 (0.44) | 0.86 (1.48) | -1.09 (-4.40, 2.22) |
| MS2 | 2.30 (1.41) | 1.45 (0.51) | 0.85 (-2.36, 4.06) |
| MS3 | -0.27 (0.18) | -0.17 (1.54) | -0.10 (-3.43, 3.23) |
| MS4 | 1.93 (2.01) | 1.34 (0.55) | 0.59 (-3.88, 5.05) |
| Transition counts |  |  |  |
| MS1 to MS2 | 557.50 (286.95) | 105.13 (261.83) | 452.38 (-380.79, 1285.54) |
| MS1 to MS3 | -115.75 (422.46) | -2.25 (160.60) | -113.50 (-1082.85, 855.85) |
| MS1 to MS4 | 462.25 (278.39) | -800.50 (323.62) | 1262.75 (347.18, 2178.32) * |
| MS2 to MS1 | 579.63 (279.02) | 59.25 (322.41) | 520.38 (-394.11, 1434.86) |
| MS2 to MS3 | 854.00 (348.67) | -36.13 (243.84) | 890.13 (-22.43, 1802.68) |
| MS2to MS4 | 618.00 (237.45) | -134.50 (113.13) | 752.50 (188.37, 1316.63) * |
| MS3 to MS1 | -70.63 (402.78) | -91.50 (135.51) | 20.88 (-890.57, 932.32) |
| MS3 to MS2 | 796.63 (301.45) | -38.00 (254.30) | 834.63 (-11.24, 1680.49) |
| MS3 to MS4 | 294.75 (171.77) | 119.25 (158.06) | 175.50 (-325.16, 676.16) |
| MS4 to MS1 | 395.00 (263.55) | -665.38 (287.31) | 1060.38 (224.18, 1896.57) * |
| MS4 to MS2 | 697.00 (261.10) | -178.75 (161.56) | 875.75 (217.20, 1534.30) * |
| MS4 to MS3 | 283.00 (172.22) | 28.38 (136.69) | 254.63 (-216.95, 726.20) |

SEM: standard error of the mean; MD: mean difference; * *p*<0.05, ** *p*<0.01.

**Table S8. Comparison of current source density and functional connectivity between prolonged intermittent theta-burst stimulation (piTBS) and sham groups pre- and post-intervention**

| **Variables** | **band** | **BA** | **Trend** |
| --- | --- | --- | --- |
| Current source density | delta | BA6L | lower |
|  |  | BA2L | lower |
|  | theta | BA8L | lower |
|  |  | BA9L | lower |
|  |  | BA44L | lower |
|  | alpha | BA9L | higher |
|  |  | BA6L | higher |
|  |  | BA2L | higher |
|  |  | BA5L | higher |
| Functional connectivity | delta | BA46L- BA1L | higher |
|  |  | BA46L-BA40R | higher |
|  | theta | BA1L-BA1R | higher |
|  |  | BA1L-BA2L | higher |
|  |  | BA1L-BA2R | higher |
|  |  | BA3L-BA4L | higher |
|  |  | BA3L-BA3R | higher |
|  | alpha | BA4L-BA46L | higher |
|  |  | BA4L-BA9L | higher |
|  |  | BA4L-BA10L | higher |
|  |  | BA10L-BA5L | higher |
|  |  | BA10L-BA2R | higher |
|  |  | BA5L-BA11L | higher |
|  |  | BA9L-BA22R | higher |
|  |  | BA3L-BA7L | higher |
|  |  | BA3L-BA1L | higher |
|  | beta | BA1L-BA1R | higher |

L: left; R: right.

**Table S9. Comparison of serum markers between prolonged intermittent theta-burst stimulation (piTBS) and sham groups pre- and post-intervention**

| **Variables** | **piTBS** | **sham** | **iTBS vs sham** |
| --- | --- | --- | --- |
|  | Mean (SEM) | Mean (SEM) | MD (95%CI) |
| BDNF | 160.55 (40.77) | 38.96 (36.80) | 121.59 (6.21, 236.97) * |
| Dopamine | 5.05 (5.41) | 2.35 (1.72) | 2.70 (-9.22, 14.62) |
| Glutamate | 1.25 (1.38) | 0.91 (0.82) | 0.34 (-3.04, 3.71) |
| γ-aminobutyric acid | 386.14 (201.70) | -85.69 (249.28) | 471.83 (-201.86, 1145.51) |
|  | Median (quartiles) | Median (quartiles) | Z-score (*p*) |
| Serotonin | 26.40 (-14.38, 60.19) | 8.62 (3.87, 23.66) | 0.529 (0.597) |

SEM: standard error of the mean; MD: mean difference; * *p* < 0.05.
